# Supplementary material for: Facial Rejuvenation: A Global Trend of Dermatological Procedures in the Last Decade
Source: PubMed Central journal article supplement — Plast Reconstr Surg Glob Open. 2024 Jun 4;12(6):e5801. doi: 10.1097/GOX.0000000000005801 (PMC11150033; doi:10.1097/gox.0000000000005801), 2024-06-04
Supplement: gox-12-e5801-s007.pdf [file gox-12-e5801-s007.pdf]

### Supplementary Digital Content 7: Ongoing Clinical Trials

| S. No. | Title                                                                                                                                                      | Interventions                                                                                        | Enrollment      | Start             | Completion        | Locations                               | NCT          | Status     | Category            |
|--------|------------------------------------------------------------------------------------------------------------------------------------------------------------|------------------------------------------------------------------------------------------------------|-----------------|-------------------|-------------------|-----------------------------------------|--------------|------------|---------------------|
| 1      | A Study to Evaluate Satisfaction in Adult Participants With the Aesthetics of the Periorbital Area After JUVÉDERM® Fillers and BOTOX®/VISTABEL® Injections | Drug: BOTOX®/VI STABEL®, Facial Injection                                                            | 80 participants | January 5, 2023   | October 14, 2023  | Australia, Belgium, and United Kingdom. | NCT0564 7551 | Recruiting | facial aesthetics   |
| 2      | A Clinical Histology Study Evaluating Biostimulatory Activity Longevity of Injectable Poly-L-Lactic Acid (Sculptra Aesthetic) for Facial Rejuvenation      | Device: Sculptra Aesthetic Injectable implant containing microparticles of poly-L-lactic acid (PLLA) | 10 participants | August 9, 2021    | September 1, 2022 | United States, New York                 | NCT0495 7446 | Recruiting | facial aesthetics   |
| 3      | Comparison of the Effects of Two Frequencies of Application of Photobiomodulation on Facial Rejuvenation                                                   | Radiation: Photobiomodulation                                                                        | 45 participants | May 30, 2021      | January 30, 2023  | Brazil                                  | NCT04911 140 | Recruiting | facial rejuvenation |
| 4      | Periocular Rejuvenation by Topical Hyaluronic Acid Nano Particles                                                                                          | Drug: Hyaluronic acid NanoGelDrug: Placebo gel                                                       | 30 participants | December 21, 2022 | 01 August 2023    | Egypt                                   | NCT05742 399 | Recruiting | eyelid rejuvenation |
| 5      | Medial Fat Pad Preservation in Upper Eyelid Blepharoplasty                                                                                                 | Procedure: medial fat preservation upper blepharoplasty                                              | 50 participants | December 24, 2020 | 01 June 2022      | United Arab Emirates                    | NCT05016 362 | Recruiting | blepharoplasty      |

|    |                                                                                               |                                  |                  |                   |                    |                               |             |                        |                |
|----|-----------------------------------------------------------------------------------------------|----------------------------------|------------------|-------------------|--------------------|-------------------------------|-------------|------------------------|----------------|
| 6  | A Comparison of the Effect of Suture Material on Blepharoplasty Incision                      | Plain gut suture                 | 50 participants  | May 30, 2020      | June 30, 2024      | United States, Massachusetts  | NCT04585217 | Recruiting             | blepharoplasty |
| 7  | The Effect of Upper Blepharoplasty on Vision Quality in the Early Postoperative Period        | Upper blepharoplasty             | 40 participants  | September 8, 2022 | June 1, 2023       | Croatia                       | NCT05549713 | Recruiting             | blepharoplasty |
| 8  | Use of Tranexamic Acid in Blepharoplasties                                                    | Tranexamic acid injection        | 40 participants  | February 20, 2020 | September 20, 2023 | United States, Illinois       | NCT04724772 | Recruiting             | blepharoplasty |
| 9  | Brassiere Brow Suture and Internal Browbexy                                                   | Browbexy                         | 30 participants  | January 10, 2021  | July 20, 2022      | United Arab Emirates          | NCT04861454 | Recruiting             | blepharoplasty |
| 10 | Fibrin Sealant in Eyelid Surgery                                                              | Fibrin Sealant                   | 30 participants  | 01 May 2022       | 01 June 2023       | University of Calgary         | NCT05358977 | Recruiting             | blepharoplasty |
| 11 | Effect of Upper Eyelid Surgeries on Corneal Characteristics                                   | levator muscle resection surgery | 50 participants  | February 6, 2023  | June 30, 2024      | Taiwan                        | NCT05750251 | Recruiting             | blepharoplasty |
| 12 | RECELL to Promote Healing Following Carbon Dioxide (CO2) Laser Treatment in Cosmetic Patients | Drug: ReCell                     | 10 participants  | March 22, 2023    | 01 December 2023   | United States, North Carolina | NCT05386368 | Recruiting             | facelift       |
| 13 | Comparison of an Office-based Limited Facelift and Hospital-based Full Facelift (COAL2)       | Limited facelift                 | 100 participants | June 30, 2022     | 01 July 2023       | United States, Virginia       | NCT05419609 | Recruiting             | facelift       |
| 14 | Onabotulinum Toxin A in Direct Brow Lift                                                      | Botox Injectable Product         | 16 participants  | November 18, 2020 | 01 July 2024       | Canada, Nova Scotia           | NCT04383912 | Recruiting             | browlift       |
| 15 | SofWave Treatment to Lift Lax Tissue in the Submental and Neck Zones and to Lift the Eyebrow  | Device: Sofwave                  | 20 participants  | February 27, 2020 | February 27, 2023  | United States, California     | NCT04969380 | Recruiting             | browlift       |
| 16 | Clinical Investigation to Assess Safety and                                                   | LIFT001                          | 50 participants  | August 2, 2022    | September 1, 2023  | Spain                         | NCT05450380 | Active, not recruiting | dermal fillers |

| Performance of Dermal Filler of Hyaluronic Acid |                                                                                                                      |                                                                                                          |                 |                   |                   |                             |               |                        |                |
|-------------------------------------------------|----------------------------------------------------------------------------------------------------------------------|----------------------------------------------------------------------------------------------------------|-----------------|-------------------|-------------------|-----------------------------|---------------|------------------------|----------------|
| 17                                              | Safety and Performance of DKL Crosslinked Sodium Hyaluronate 26 Dermal Filler for Cheek Augmentation                 | Device: DKL crosslinked sodium hyaluronate 26<br>Device: Juvéderm Voluma™ with lidocaine (Allergan, Inc) | 40 participants | August 30, 2021   | August 30, 2022   | Sweden                      | NCT05021926   | Recruiting             | dermal fillers |
| 18                                              | A Prospective Evaluation of Infraorbital Filler Injection                                                            | Juvederm Volbella XC hyaluronic acid dermal filler injection                                             | 12 participants | January 6, 2023   | June 17, 2023     | United States, Pennsylvania | NCT05694286   | Active, not recruiting | dermal fillers |
| 19                                              | Evaluation of HA Dermal Fillers in the Treatment of Pathological Facial Lipoatrophy (HAtrophy)                       | Device: Dermal filler                                                                                    | 30 participants | April 15, 2023    | October 15, 2024  | France                      | : NCT05776836 | Not yet recruiting     | dermal fillers |
| 20                                              | A Clinical Investigation of the Decoria® Aesthetic Group (DAG) for Correction of Nasolabial Folds (NLF) (Decorate01) | Device: Decoria intense                                                                                  | 64 participants | 01 February 2022  | 01 June 2023      | Sweden                      | NCT05235126   | Not yet recruiting     | dermal fillers |
| 21                                              | The Evaluation of the Safety and Effectiveness of ANIMERS Chiara LA and JUVÉDERM VOLUMA® for Aging Mid-Face          | Device: ANIMERS Chiara LA<br>Device: JUVÉDERM VOLUMA®                                                    | 20 participants | December 31, 2020 | June 1, 2023      | Taiwan                      | NCT04622085   | Active, not recruiting | dermal fillers |
| 22                                              | Comparative Ultrasound Analysis of Two Hyaluronic Acid Dermal Fillers (RES)                                          | Device: Restylane Contour<br>Device: Juvederm Voluma                                                     | 15 participants | July 12, 2022     | December 31, 2023 | United States, Florida      | NCT05622851   | Active, not recruiting | dermal fillers |

|    |                                                                                                                            |                                                 |                  |                    |                   |                        |             |                        |                |
|----|----------------------------------------------------------------------------------------------------------------------------|-------------------------------------------------|------------------|--------------------|-------------------|------------------------|-------------|------------------------|----------------|
| 23 | Evaluating the Performance and Safety of the Medical Device Auralya® in the Treatment of Facial Dermal Tissue Defects      | Device: Auralya                                 | 48 participants  | March 21, 2022     | December 11, 2022 | Romania                | NCT05239130 | Active, not recruiting | dermal fillers |
| 24 | The Evaluation of the Safety and Effectiveness of a Novel Gel-type Sodium Hyaluronate for the Correction of Aging Mid-face | Device: 2% HA                                   | 80 participants  | December 31, 2020  | June 1, 2023      | Taiwan                 | NCT04599335 | Active, not recruiting | dermal fillers |
| 25 | Safety and Effectiveness of STYLAGE® L for Correction of Moderate and Severe Nasolabial Folds in Chinese Adults            | Device: STYLAGE® L<br>Device: Active Comparator | 390 participants | May 6, 2021        | 01 December 2022  | china                  | NCT04861766 | Active, not recruiting | dermal fillers |
| 26 | Gene Expression Study Between Two Dermal Injectables Hydroxylapatite Semi-permanent Filler (Sculptra)                      | Device: Sculptra<br>Device: Radiesse Plus       | 20 participants  | September 28, 2022 | April 30, 2023    | United States, Florida | NCT05620043 | Active, not recruiting | dermal fillers |
