# Supplementary figures and images for: Facial Rejuvenation: A Global Trend of Dermatological Procedures in the Last Decade
Source: PubMed Central journal article supplement — Plast Reconstr Surg Glob Open. 2024 Jun 4;12(6):e5801. doi: 10.1097/GOX.0000000000005801 (PMC11150033; doi:10.1097/gox.0000000000005801), 2024-06-04

**Supplementary Digital Content 1: Publications (sub-grouped)**

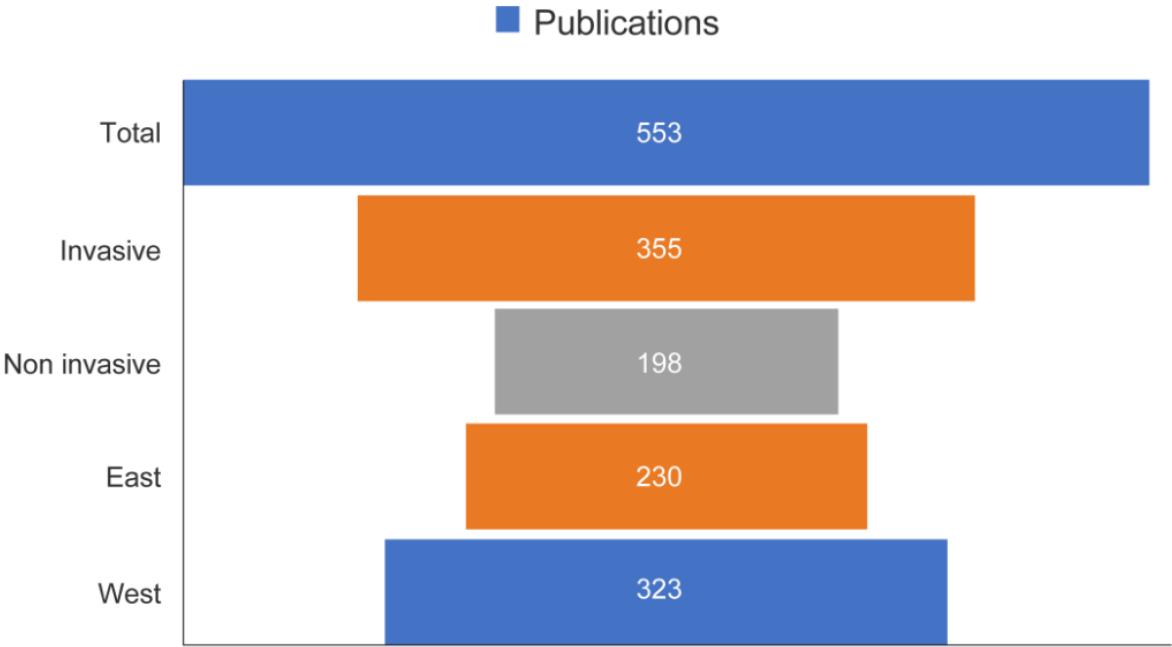

Supplement: gox-12-e5801-s001.pdf [file gox-12-e5801-s001.pdf]

## Supplementary Digital Content 2: Publications (Year-Wise)

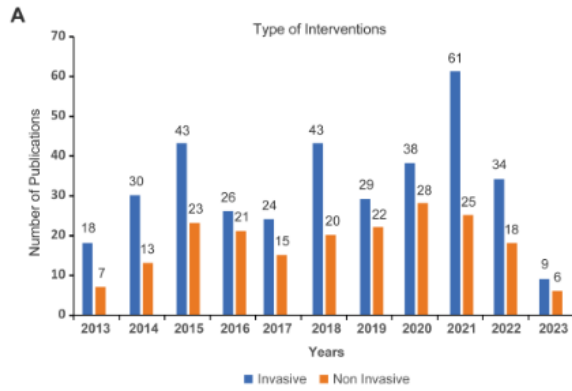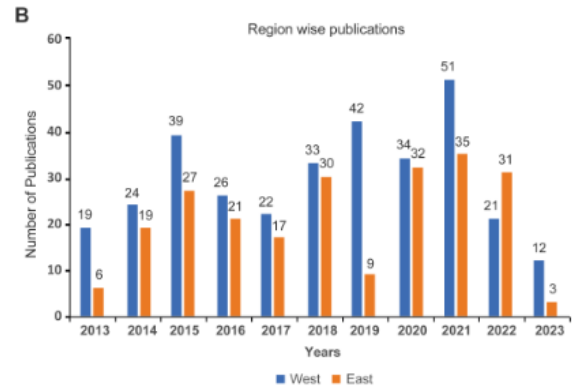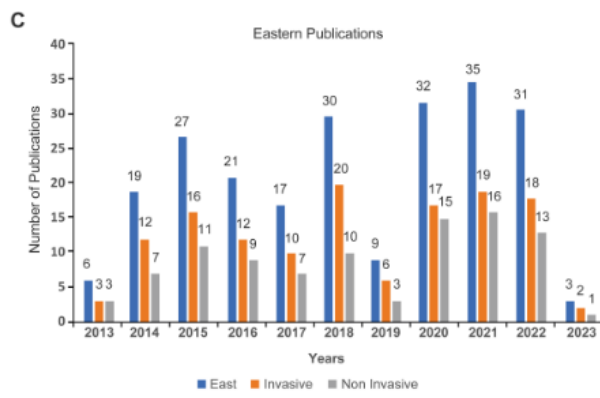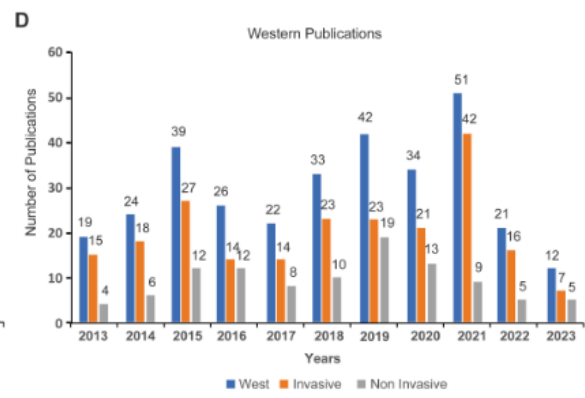

Supplement: gox-12-e5801-s002.pdf [file gox-12-e5801-s002.pdf]

### Supplementary Digital Content 3: Publications (Country Wise)

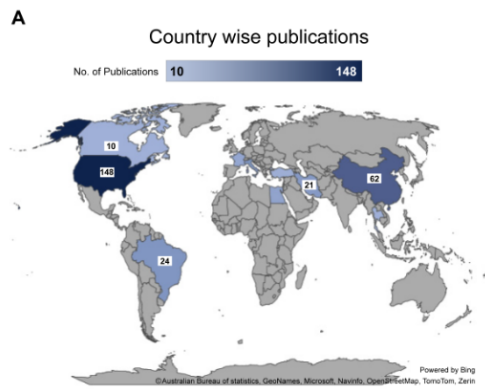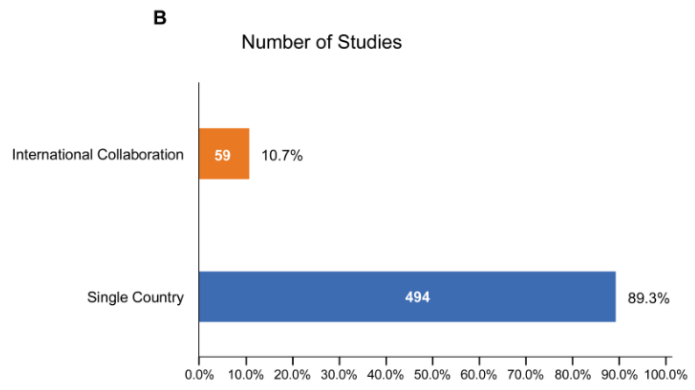

Supplement: gox-12-e5801-s003.pdf [file gox-12-e5801-s003.pdf]

Supplementary Digital Content 4: Top cited authors analysed from VosViewer

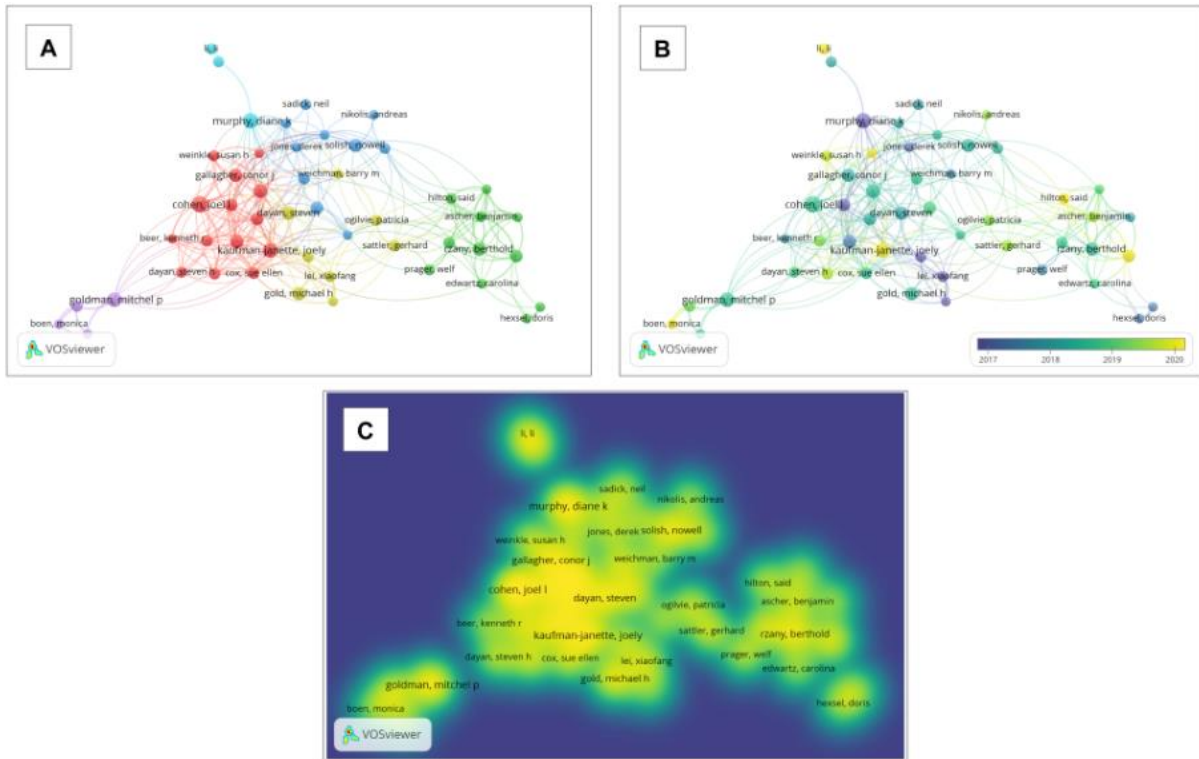

Supplement: gox-12-e5801-s004.pdf [file gox-12-e5801-s004.pdf]

## Supplementary Digital Content 5: Top author keywords analysed from VosViewer

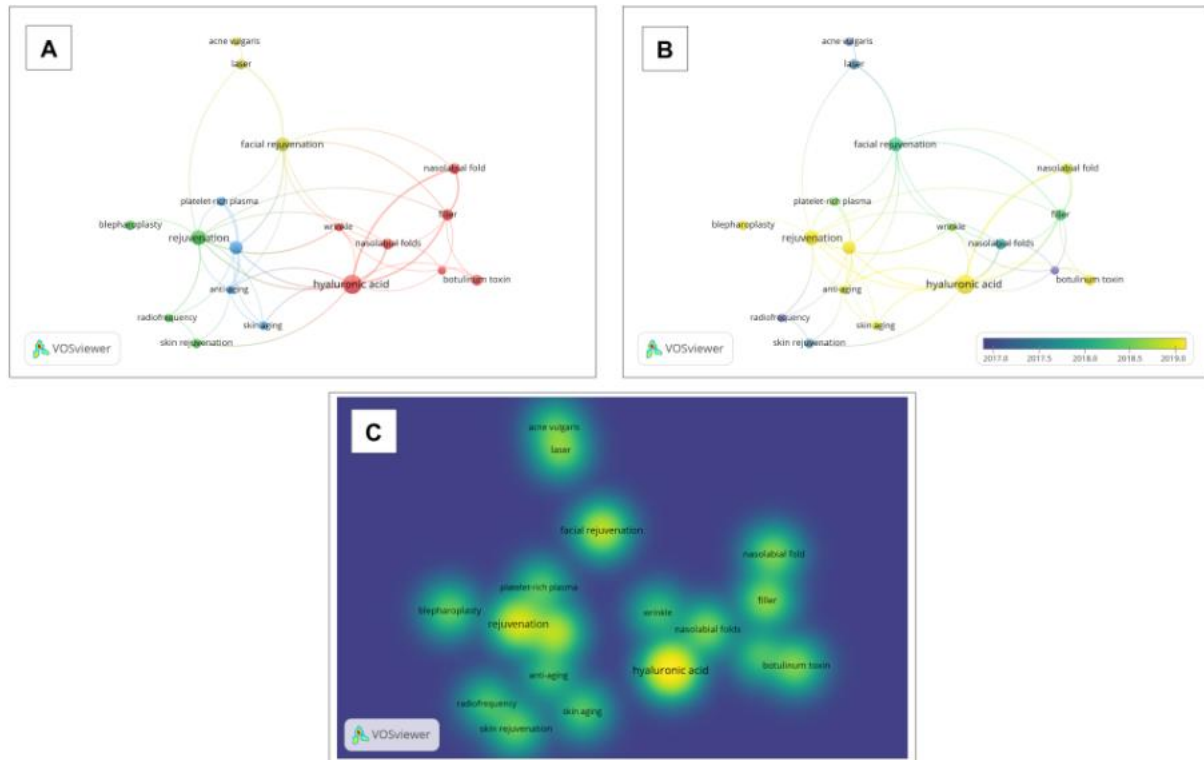

Supplement: gox-12-e5801-s005.pdf [file gox-12-e5801-s005.pdf]

**Supplementary Digital Content 6: Level of Evidence based on the study design of publications**

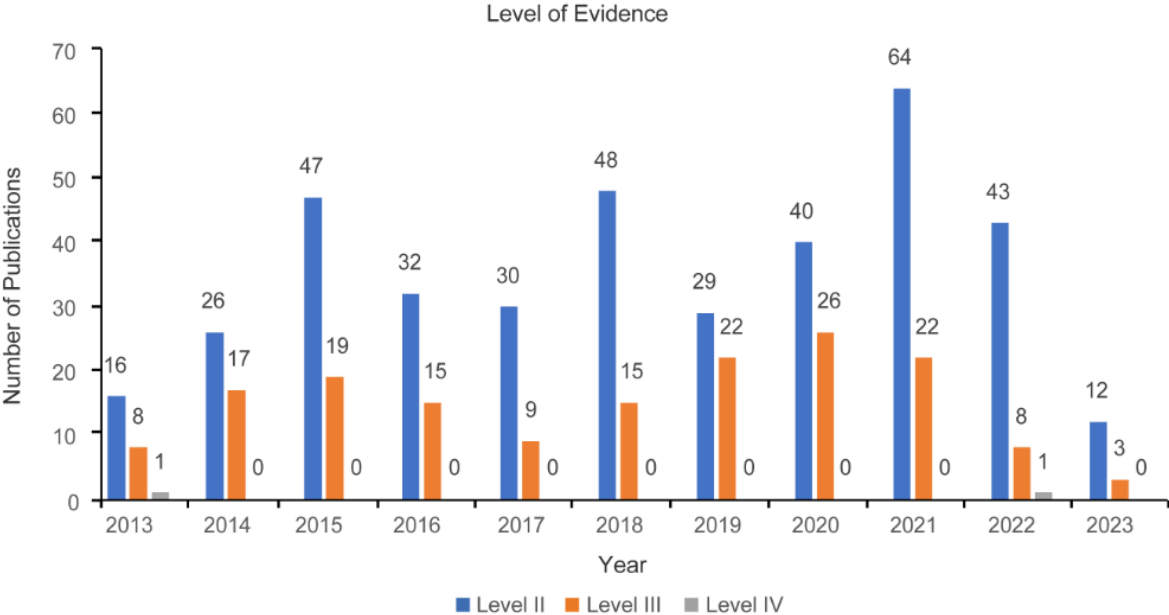

Supplement: gox-12-e5801-s006.pdf [file gox-12-e5801-s006.pdf]
